# Supplementary material
Source: PubMed Central journal article supplement (PMC8223144)

## Supplementary Online Content

D'Journo XB, Boulate D, Fourdrain A, et al ; International Esodata Study Group. Risk prediction model of 90-day mortality after esophagectomy for cancer. *JAMA Surg*. Published online June 23, 2021. doi:10.1001/jamasurg.2021.2376

**eAppendix.** List of Contributing Centers (10 America, 23 Europe, 5 Asia, 1 Australia)

**eTable 1.** Additional Demographic and Clinical Comparison Between Developmental and Validation Cohort

**eTable 2.** Association Between Risk Factors With 90-Day Mortality in the Development Cohort

**eTable 3.** Repartition of Patients According to the Score and Collapsing in Homogeneous Risk Group

**eTable 4.** Repartition of Patients According to the Final Score and According to Risk Groups

**eTable 5.** Risk Group With Respective Mortality and Number of Patients

**eTable 6.** Predicted Mortality in Relation to the Sum Score

**eTable 7.** Calculation of the Score

**eTable 8.** Repartition of Death and Complications Among the Whole Cohort and Among Each Risk Group

**eFigure 1.** Flowchart of the Study

**eFigure 2.** Funnel Plot Showing the 90-Day Deaths According to the Hospital Volume Represented by the Mean Number of Procedures of Esophagectomy/Year/Center

**eFigure 3.** Distribution of Patients in the Validation and in the Development Cohort According to Final Score

**eFigure 4.** ROC Curve of Prediction 90-Day Mortality in Validation, in Development Cohort, and in Total Cohort of the Final Score

**eFigure 5.** Calibration of 90-Day Mortality After Esophagectomy (n=8403).

This supplementary material has been provided by the authors to give readers additional information about their work.

**eAppendix.** List of Contributing Centers (10 America, 23 Europe, 5 Asia, 1 Australia)

| <b>Countries: 20</b> | <b>Institutions: 39</b>                                                                                                                                                                                                                                                                                                                                                                                                                                                            |
|----------------------|------------------------------------------------------------------------------------------------------------------------------------------------------------------------------------------------------------------------------------------------------------------------------------------------------------------------------------------------------------------------------------------------------------------------------------------------------------------------------------|
| Australia            | Princess Alexandra Hospital, University of Queensland, Brisbane                                                                                                                                                                                                                                                                                                                                                                                                                    |
| Belgium              | Katholieke Universiteit Leuven, Leuven                                                                                                                                                                                                                                                                                                                                                                                                                                             |
| Brazil               | University of Sao Paulo School of Medicine, Sao Paulo                                                                                                                                                                                                                                                                                                                                                                                                                              |
| Canada               | Toronto General Hospital, Toronto                                                                                                                                                                                                                                                                                                                                                                                                                                                  |
| China                | Sichuan Cancer Hospital & Institute, Chengdu<br>Queen Mary Hospital, The University of Hong Kong, Hong Kong SAR                                                                                                                                                                                                                                                                                                                                                                    |
| Denmark              | Odense University Hospital, Odense                                                                                                                                                                                                                                                                                                                                                                                                                                                 |
| France               | Claude Huriez University Hospital, Lille<br>Aix-Marseille University, North Hospital, Marseille                                                                                                                                                                                                                                                                                                                                                                                    |
| Germany              | Center for Esophageal Diseases, Elisabeth Hospital Essen, University Medicine Essen, Essen<br>University Hospital of Cologne, Cologne                                                                                                                                                                                                                                                                                                                                              |
| India                | Tata Memorial Centre, Mumbai                                                                                                                                                                                                                                                                                                                                                                                                                                                       |
| Ireland              | St. James's Hospital Trinity College, Dublin                                                                                                                                                                                                                                                                                                                                                                                                                                       |
| Italy                | University of Verona, Verona<br>Vita-Salute San Raffaele University, Milan                                                                                                                                                                                                                                                                                                                                                                                                         |
| Japan                | Keio University, Tokyo                                                                                                                                                                                                                                                                                                                                                                                                                                                             |
| Netherlands          | Amsterdam UMC, University of Amsterdam, Amsterdam<br>Erasmus Medical Center, Rotterdam<br>University Medical Center, Utrecht                                                                                                                                                                                                                                                                                                                                                       |
| Northern Ireland     | Royal Victoria Hospital, Belfast                                                                                                                                                                                                                                                                                                                                                                                                                                                   |
| Singapore            | National University Hospital, Singapore                                                                                                                                                                                                                                                                                                                                                                                                                                            |
| Spain                | Hospital Universitario del Mar, Barcelona                                                                                                                                                                                                                                                                                                                                                                                                                                          |
| Sweden               | Karolinska Institutet and Karolinska University Hospital, Stockholm                                                                                                                                                                                                                                                                                                                                                                                                                |
| Switzerland          | Hirslanden Medical Center, Zurich                                                                                                                                                                                                                                                                                                                                                                                                                                                  |
| UK                   | Queen Elizabeth Hospital Birmingham, UHB Foundation Trust, Birmingham<br>Cambridge Oesophago-Gastric Centre, Addenbrookes Hospital, Cambridge<br>Guy's & St Thomas' NHS Foundation Trust, London<br>Northern Oesophagogastric Cancer Unit, Royal Victoria Infirmary, Newcastle upon Tyne<br>Nottingham University Hospitals NHS Trust, Nottingham<br>Oxford University Hospitals NHS Foundation Trust, Oxford<br>University Hospital Southampton NHS Foundation Trust, Southampton |
| USA                  | University of Michigan Health System, Ann Arbor, MI<br>Massachusetts General Hospital, Boston, MA<br>The University of Chicago Medicine, Chicago, IL<br>MD Anderson Cancer Center, Houston, TX<br>Memorial Sloan Kettering Cancer Center, New York City, NY<br>Esophageal and Lung Institute, Allegheny Health Network, Pittsburgh, PA<br>Oregon Health and Science University, Portland, OR<br>Virginia Mason Medical Center, Seattle, WA                                         |

**eTable 1. Additional demographic and clinical comparison between developmental and validation cohort**

| <b>N (%)</b>                                  | <b>Total<br/>N=8403</b> | <b>Development<br/>cohort (N=4172)</b> | <b>Validation cohort<br/>(N=4231)</b> | <b>P-value</b> |
|-----------------------------------------------|-------------------------|----------------------------------------|---------------------------------------|----------------|
| Gender                                        |                         |                                        |                                       | .622           |
| Female                                        | 1762 (21%)              | 884 (21.2)                             | 878 (20.8%)                           |                |
| Male                                          | 6641 (79%)              | 3288 (78.8%)                           | 3353 (79.2%)                          |                |
| ASA status score                              |                         |                                        |                                       | .457           |
| 1                                             | 1042 (12.4%)            | 540 (12.9%)                            | 502 (11.9%)                           |                |
| 2                                             | 3955 (47.1%)            | 1941 (46.5%)                           | 2014 (47.6%)                          |                |
| 3                                             | 3255 (38.7%)            | 1614 (38.7%)                           | 1641 (38.8%)                          |                |
| 4                                             | 151 (1.8%)              | 77 (1.8%)                              | 74 (1.7%)                             |                |
| Age-related Charlson comorbidity index (ACCI) |                         |                                        |                                       | .634           |
| 0-3                                           | 2970 (35.3%)            | 1471 (35.2%)                           | 1499 (35.4%)                          |                |
| 4-7                                           | 5385 (64%)              | 2678 (64%)                             | 2707 (63.9%)                          |                |
| ≥8                                            | 48 (0.1%)               | 23 (0.1%)                              | 25 (0.1%)                             |                |
| Charlson comorbidities                        |                         |                                        |                                       |                |
| Myocardial infarction (%)                     | 442 (5.3)               | 215 (5.2)                              | 227 (5.4)                             | .664           |
| Congestive heart failure (%)                  | 240 (2.9)               | 100 (2.4)                              | 140 (3.3)                             | .012           |
| Chronic pulmonary disease (%)                 | 845 (10.1)              | 417 (10)                               | 428 (10.1)                            | .854           |
| Connective tissue disease (%)                 | 71 (0.8)                | 36 (0.9)                               | 35 (0.8)                              | .858           |
| Peripheral vascular disease (%)               | 433 (5.2)               | 220 (5.3)                              | 213 (5)                               | .62            |
| Cerebrovascular disease (%)                   | 262 (3.1)               | 120 (2.9)                              | 142 (3.4)                             | .206           |
| Dementia (%)                                  | 15 (0.2)                | 6 (0.1)                                | 9 (0.2)                               | .607           |
| Peptic ulcer disease (%)                      | 84 (1)                  | 46 (1.1)                               | 38 (0.9)                              | .346           |
| Diabetes mellitus (uncomplicated) (%)         | 1058 (12.6)             | 550 (13.2)                             | 508 (12)                              | .104           |
| Diabetes mellitus (end-organ damage) (%)      | 62 (0.7)                | 33 (0.8)                               | 29 (0.7)                              | .572           |
| Leukemia (%)                                  | 23 (0.3)                | 16 (0.4)                               | 7 (0.2)                               | .062           |
| Malignant lymphoma (%)                        | 61 (0.7)                | 31 (0.7)                               | 30 (0.7)                              | .85            |
| Liver disease (mild) (%)                      | 167 (2)                 | 84 (2)                                 | 83 (2)                                | .865           |
| Liver disease (moderate to severe) (%)        | 35 (0.4)                | 20 (0.5)                               | 15 (0.4)                              | .374           |
| Hemiplegia (%)                                | 9 (0.1)                 | 5 (0.1)                                | 4 (0.1)                               | .491           |
| Solid tumor present (%)                       | 8228 (97.9)             | 4086 (97.9)                            | 4142 (97.9)                           | .892           |
| Metastatic tumor present (%)                  | 73 (0.9)                | 33 (0.8)                               | 40 (0.9)                              | .446           |
| Moderate to severe renal disease (%)          | 136 (1.6)               | 66 (1.6)                               | 70 (1.7)                              | .792           |
| AIDS (%)                                      | 7 (0.1)                 | 2 (0.1)                                | 5 (0.1)                               | .232           |
| Tumor histology (%)                           |                         |                                        |                                       | .671           |
| Adenocarcinoma                                | 3923 (46.7)             | 1951 (46.8)                            | 1972 (46.6)                           |                |
| Squamous cell carcinoma                       | 1752 (31.2%)            | 888 (21.3)                             | 864 (20.4)                            |                |
| Other malignancy                              | 107 (1.3)               | 54 (1.3)                               | 53 (1.3)                              |                |
| Unknown                                       | 2621 (31.2)             | 1279 (30.7)                            | 1342 (31.7)                           |                |
| Tumor cT stage (%)                            |                         |                                        |                                       | .497           |
| T0                                            | 24 (0.3)                | 14 (0.3)                               | 10 (0.2)                              |                |
| T1                                            | 735 (8.7)               | 369 (8.8)                              | 366 (8.7)                             |                |
| T2                                            | 1372 (16.3)             | 654 (15.7)                             | 718 (17)                              |                |
| T3                                            | 5610 (66.8)             | 2803 (67.2)                            | 2807 (66.3)                           |                |
| T4                                            | 395 (4.7)               | 205 (4.9)                              | 190 (4.5)                             |                |
| Tis                                           | 55 (0.7)                | 23 (0.6)                               | 32 (0.8)                              |                |
| Tx                                            | 212 (2.5)               | 104 (2.5)                              | 108 (2.6)                             |                |
| Tumor cN stage (%)                            |                         |                                        |                                       | .863           |
| N0                                            | 2988 (35.6)             | 1469 (35.2)                            | 1519 (35.9)                           |                |
| N1                                            | 3173 (37.8)             | 1577 (37.8)                            | 1596 (37.7)                           |                |
| N2                                            | 1061 (12.6)             | 536 (12.8)                             | 525 (12.4)                            |                |
| N3                                            | 225 (2.7)               | 107 (2.6)                              | 118 (2.8)                             |                |
| Nx                                            | 956 (11.4)              | 483 (11.6)                             | 473 (11.2)                            |                |
| Tumor location (%)                            |                         |                                        |                                       | .631           |

|                         |              |              |              |      |
|-------------------------|--------------|--------------|--------------|------|
| Proximal ½ of esophagus | 1050 (12.5)  | 529 (12.7)   | 521 (12.3)   |      |
| Distal ½ of esophagus   | 4495 (53.5)  | 2210 (53)    | 2285 (54)    |      |
| At the GE junction      | 2858 (34)    | 1433 (34.3)  | 1425 (33.7)  |      |
| Surgical approach       |              |              |              | .70  |
| Minimally invasive      | 4930 (58.7%) | 2439 (58.5%) | 2491 (58.9%) |      |
| Open                    | 3473 (41.3%) | 1733 (41.5%) | 1740 (41.1%) |      |
| Transhiatal             | 695 (8.3%)   | 354 (8.5%)   | 341 (8.1%)   | .768 |
| Transthoracic           | 7708 (91.7%) | 3818 (91.5%) | 3890 (91.9%) |      |

Footnote: Footnote table 1: Fisher's exact test and chi-square test were used as appropriate.

**eTable 2. Association between risk factors with 90-day mortality in the development cohort**

| (%)                                      | Alive after 90 days<br>N= 3988 | Deceased within 90<br>days<br>N= 184 | P-value |
|------------------------------------------|--------------------------------|--------------------------------------|---------|
| Gender (%)                               |                                |                                      |         |
| Female                                   | 858 (21.5%)                    | 26 (14.1%)                           | .017    |
| Male                                     | 3130 (78.5%)                   | 158 (85.9%)                          |         |
| Age group, yrs                           |                                |                                      |         |
| 40 or less                               | 72 (1.8%)                      | 3 (1.6%)                             | .002    |
| 41–50                                    | 311 (7.8%)                     | 10 (5.4%)                            |         |
| 51–60                                    | 1003 (25.2%)                   | 35 (19%)                             |         |
| 61–70                                    | 1567 (39.3%)                   | 74 (40.2%)                           |         |
| 71–80                                    | 927 (23.2%)                    | 48 (26.1%)                           |         |
| More than 80                             | 108 (2.7%)                     | 14 (7.6%)                            |         |
| BMI group (%)                            |                                |                                      | .003    |
| <18.5                                    | 208 (5.2%)                     | 19 (10.3%)                           |         |
| 18.5–24.9                                | 1584 (39.7%)                   | 84 (45.7%)                           |         |
| 25–29.9                                  | 1425 (35.7%)                   | 53 (28.8%)                           |         |
| ≥30                                      | 771 (19.3%)                    | 28 (15.2%)                           |         |
| WHO/ECOG performance                     |                                |                                      | .008    |
| 0                                        | 1997 (50.1%)                   | 76 (41.3%)                           |         |
| 1                                        | 1788 (44.8%)                   | 90 (48.9%)                           |         |
| 2                                        | 172 (4.3%)                     | 14 (7.6%)                            |         |
| 3                                        | 31 (0.8%)                      | 4 (2.2%)                             |         |
| Myocardial infarction (%)                | 194 (4.9%)                     | 21 (11.4%)                           | <0.01   |
| Congestive heart failure (%)             | 96 (2.4%)                      | 4 (2.2%)                             | .84     |
| Chronic pulmonary disease (%)            | 393 (9.9%)                     | 24 (13%)                             | .159    |
| Connective tissue disease (%)            | 32 (0.8%)                      | 4 (2.2%)                             | .049    |
| Peripheral vascular disease (%)          | 200 (5%)                       | 20 (10.9%)                           | .001    |
| Cerebrovascular disease (%)              | 112 (2.8%)                     | 8 (4.3%)                             | .222    |
| Dementia (%)                             | 6 (0.2%)                       | 0                                    | .763    |
| Peptic ulcer disease (%)                 | 44 (1.1%)                      | 2 (1.1%)                             | .923    |
| Diabetes mellitus (uncomplicated) (%)    | 519 (13%)                      | 31 (16.8%)                           | .133    |
| Diabetes mellitus (end-organ damage) (%) | 33 (0.8%)                      | 0                                    | .215    |
| Leukemia (%)                             | 16 (0.4%)                      | 0                                    | .389    |
| Malignant lymphoma (%)                   | 28 (0.7%)                      | 3 (1.6%)                             | .152    |
| Liver disease (mild) (%)                 | 79 (2%)                        | 5 (2.7%)                             | .487    |
| Liver disease (moderate to severe) (%)   | 16 (0.4%)                      | 4 (2.2%)                             | .01     |
| Hemiplegia (%)                           | 4 (0.1%)                       | 1 (0.5%)                             | .202    |
| Solid tumor present (%)                  | 3906 (97.9%)                   | 180(97.8%)                           | .912    |
| Metastatic tumor present (%)             | 32 (0.8%)                      | 1 (0.5%)                             | .698    |
| Moderate to severe renal disease (%)     | 59 (1.5%)                      | 7 (3.8%)                             | .013    |
| AIDS (%)                                 | 2 (0.1%)                       | 0                                    | .914    |
| Timing to surgery (%)                    |                                |                                      | .303    |
| Elective                                 | 3981 (99.8%)                   | 183 (99.5%)                          |         |
| Emergency                                | 7 (0.2%)                       | 1 (0.5%)                             |         |
| Tumour location (%)                      |                                |                                      | .133    |
| Proximal ½ of esophagus                  | 497 (12.5%)                    | 32 (17.4%)                           |         |
| Distal ½ of esophagus                    | 2122 (53.2%)                   | 88 (47.8%)                           |         |
| At the GE junction                       | 1369 (34.3%)                   | 64 (34.8%)                           |         |
| Neoadjuvant therapy (%)                  |                                |                                      | .072    |
| Chemoradiotherapy                        | 1865 (46.8%)                   | 104 (56.5%)                          |         |
| Chemotherapy                             | 1158 (29%)                     | 41 (22.3%)                           |         |
| Definitive chemoradiotherapy             | 71 (1.8%)                      | 5 (2.7%)                             |         |
| None                                     | 888 (22.3%)                    | 34 (18.5%)                           |         |
| Radiotherapy                             | 6 (0.2%)                       | 0                                    |         |

|                                        |              |             |      |
|----------------------------------------|--------------|-------------|------|
| Tumor histology (%)                    |              |             | .751 |
| Adenocarcinoma                         | 1861 (46.7%) | 90 (48.9%)  |      |
| Squamous cell carcinoma                | 847 (21.2%)  | 41 (22.3%)  |      |
| Other malignancy                       | 51 (1.3%)    | 3 (1.6%)    |      |
| Unknown                                | 1229 (30.8%) | 50 (27.2%)  |      |
| Surgical approach (%)                  |              |             | .947 |
| Minimally invasive                     | 2331 (58.5%) | 108 (58.7%) |      |
| Open                                   | 1657 (41.5%) | 76 (41.3%)  |      |
| Volume activity (mean/year/center) (%) |              |             | .095 |
| 0-45.9                                 | 1043 (26.2%) | 59 (32.1%)  |      |
| 46-71.6                                | 934 (23.4%)  | 46 (25%)    |      |
| 71.7-108.6                             | 1089 (27.3%) | 49 (26.6%)  |      |
| >108.6                                 | 922 (23.1%)  | 30 (16.3%)  |      |

**eTable 3. Repartition of patients according to the score and collapsing in homogeneous risk group:**

- Very low risk (score  $\geq 1$ ): grey
- Low risk (score=0): green
- Medium risk (score  $< 0$  and  $\geq -2$ ): yellow
- High-risk (score  $\leq -3$  and  $> -5$ ): orange
- Very high-risk patients (score  $\leq -5$ ): red

| Score | Development cohort |          |      |      | Validation cohort |          |      |      |
|-------|--------------------|----------|------|------|-------------------|----------|------|------|
|       | Alive              | Deceased | n    | %    | Alive             | Deceased | n    | %    |
| -10   | 0                  | 1        | 1    | 100  | -                 | -        | -    | -    |
| -9    | 2                  | 0        | 2    | 0    | 1                 | 0        | 1    | 0    |
| -8    | 0                  | 2        | 2    | 100  | 3                 | 1        | 4    | 25   |
| -7    | 7                  | 4        | 11   | 36.4 | 8                 | 2        | 10   | 20   |
| -6    | 17                 | 0        | 17   | 0    | 17                | 6        | 23   | 26.1 |
| -5    | 50                 | 10       | 60   | 16.7 | 50                | 4        | 54   | 7.4  |
| -4    | 121                | 12       | 133  | 9    | 124               | 7        | 131  | 5.3  |
| -3    | 223                | 22       | 245  | 9    | 215               | 24       | 239  | 10   |
| -2    | 389                | 32       | 421  | 7.6  | 367               | 19       | 386  | 4.9  |
| -1    | 843                | 44       | 887  | 5    | 814               | 46       | 860  | 5.3  |
| 0     | 1026               | 32       | 1058 | 3    | 1142              | 31       | 1173 | 2.6  |
| 1     | 807                | 19       | 826  | 2.3  | 794               | 16       | 810  | 2    |
| 2     | 342                | 5        | 347  | 1.4  | 376               | 7        | 383  | 1.8  |
| 3     | 131                | 1        | 132  | 0.8  | 128               | 4        | 132  | 3    |
| 4     | 26                 | 0        | 26   | 0    | 21                | 2        | 23   | 8.7  |
| 5     | 4                  | 0        | 4    | 0    | 2                 | 0        | 2    | 0    |

**eTable 4. Repartition of patients according to the final score and according to risk groups**

**dCRT: definitive chemoradiotherapy. BMI: body mass index.**

| Variables                                       | Weighted points | Very high risk | High risk  | Median risk | Low risk    | Very low risk |
|-------------------------------------------------|-----------------|----------------|------------|-------------|-------------|---------------|
|                                                 |                 | N=185          | N=748      | N=2554      | N=2231      | N=2685        |
| <b>Age (years) (%)</b>                          |                 |                |            |             |             |               |
| 40 or less (n=170)                              | 0               | 1 (.5)         | 11 (1.5)   | 63 (2.5)    | 58 (2.6)    | 37 (1.4)      |
| 41 – 50 (n=658)                                 | 1               | 2 (1.1)        | 23 (3.1)   | 87 (3.4)    | 154 (6.9)   | 392 (14.6)    |
| 51 – 60 (n=2076)                                | 1               | 13 (7)         | 95 (12.7)  | 305 (11.9)  | 528 (23.7)  | 1135 (42.3)   |
| 61 – 70 (n=3357)                                | 0               | 80 (43.2)      | 302 (40.4) | 1257 (49.2) | 1002 (44.9) | 716 (26.7)    |
| 71-80 (n=1920)                                  | 0               | 39 (21.1)      | 209 (27.9) | 780 (30.5)  | 487 (21.8)  | 405 (15.1)    |
| More than 80 (n=222)                            | -3              | 50 (27)        | 108 (14.4) | 62 (2.4)    | 2 (.1)      | 0             |
| <b>BMI (%)</b>                                  |                 |                |            |             |             |               |
| <18.5 (n=445)                                   | -3              | 57 (30.8)      | 209 (27.9) | 161 (6.3)   | 18 (.8)     | 0             |
| 18.5–24.9 (n=3386)                              | 0               | 71 (38.4)      | 283 (37.8) | 1326 (51.9) | 849 (38.1)  | 857 (31.9)    |
| 25–29.9 (n=2966)                                | 1               | 40 (21.6)      | 170 (22.7) | 693 (27.1)  | 891 (39.9)  | 1172 (43.6)   |
| ≥30 (n=1606)                                    | 1               | 17 (9.2)       | 86 (11.5)  | 374 (14.6)  | 473 (21.2)  | 656 (24.4)    |
| <b>Gender (%)</b>                               |                 |                |            |             |             |               |
| Male (n=6641)                                   | 0               | 170 (91.9)     | 683 (91.3) | 2288(89.6)  | 2038 (91.3) | 1462 (54.5)   |
| Female (n=1762)                                 | 2               | 15 (8)         | 65 (8.7)   | 266 (10.4)  | 193 (8.7)   | 1223 (45.5)   |
| <b>WHO/ECOG (%)</b>                             |                 |                |            |             |             |               |
| 0 (n=4205)                                      | 0               | 19 (10.3)      | 192 (25.7) | 816 (31.9)  | 1300 (58.3) | 1878 (69.9)   |
| 1 (n=3753)                                      | -1              | 108 (58.4)     | 414 (55.3) | 1563 (61.2) | 888 (39.8)  | 780 (29.1)    |
| 2 (n=379)                                       | -2              | 37 (20)        | 113 (15.1) | 160 (6.3)   | 42 (1.9)    | 27 (1)        |
| 3 (n=66)                                        | -4              | 21 (11.4)      | 29 (3.9)   | 15 (.6)     | 1 (0)       | 0             |
| <b>Myocardial Infarction (%) (n=442)</b>        | -2              | 58 (31.4)      | 181 (24.2) | 176 (6.9)   | 22 (1)      | 5 (.2)        |
| <b>Connective tissue disease (%) (n=71)</b>     | -3              | 17 (9.2)       | 29 (3.2)   | 23 (.9)     | 2 (.1)      | 0             |
| <b>Peripheral vascular disease (%) (n=433)</b>  | -2              | 68 (36.8)      | 175 (23.4) | 169 (6.6)   | 16 (.7)     | 5 (.2)        |
| <b>Liver disease moderate/severe (%) (n=35)</b> | -5              | 23 (12.4)      | 10 (1.3)   | 2 (.1)      | 0           | 0             |



|                                               |           |              |               |                |                |               |
|-----------------------------------------------|-----------|--------------|---------------|----------------|----------------|---------------|
| <b>Neoadjuvant therapy (%)</b>                |           |              |               |                |                |               |
| None (n=1927)                                 | <b>0</b>  | 40<br>(21.6) | 174<br>(23.3) | 305 (11.9)     | 437<br>(19.6)  | 971<br>(36.2) |
| dCRT (n=154)                                  | <b>-2</b> | 17 (9.2)     | 33 (4.4)      | 64 (2.5)       | 26 (1.2)       | 14 (.5)       |
| Chemotherapy only (n=2393)                    | <b>0</b>  | 37 (20)      | 182<br>(24.3) | 715 (28)       | 666<br>(29.9)  | 793<br>(29.5) |
| Chemo-Radiotherapy (n=3916)                   | <b>-1</b> | 91<br>(49.2) | 357<br>(47.7) | 1469<br>(57.5) | 1099<br>(49.3) | 900<br>(33.5) |
| <b>Hospital volume (mean/year/center) (%)</b> |           |              |               |                |                |               |
| 0-45.9 (n=2169)                               | <b>0</b>  | 78<br>(42.2) | 233<br>(31.1) | 769 (30.1)     | 536 (24)       | 553<br>(20.6) |
| 46-71.6 (n=1975)                              | <b>0</b>  | 43<br>(23.2) | 195<br>(26.1) | 703 (27.5)     | 515<br>(23.1)  | 519<br>(19.3) |
| 71.7-108.6 (n=2355)                           | <b>0</b>  | 41<br>(22.2) | 171<br>(22.9) | 741 (29)       | 677<br>(30.3)  | 725 (27)      |
| >108.6 (n=1904)                               | <b>1</b>  | 23<br>(12.4) | 149<br>(19.9) | 341 (13.4)     | 503<br>(22.5)  | 888<br>(33.1) |

**eTable 5. Risk group with respective mortality and number of patients:**

- Very low risk (score  $\geq 1$ ): grey
- Low risk (score=0): green
- Medium risk (score  $< 0$  and  $\geq -2$ ): yellow
- High-risk (score  $\leq -3$  and  $> -5$ ): orange
- Very high-risk patients (score  $\leq -5$ ): red

| Score                        | Development cohort<br>N=4172 |                | Validation cohort<br>N=4231 |                |
|------------------------------|------------------------------|----------------|-----------------------------|----------------|
|                              | Deceased/total               | Mortality<br>% | Deceased/total              | Mortality<br>% |
| Very low risk ( $\geq 1$ )   | 25/1335                      | 1.9            | 29/1350                     | 2.1            |
| Low risk (0)                 | 32/1058                      | 3              | 31/1173                     | 2.6            |
| Median risk (-1; -2)         | 76/1308                      | 5.8            | 65/1246                     | 5.2            |
| High risk ( $< -3$ ; -4)     | 34/378                       | 8.9            | 31/370                      | 8.3            |
| Very High risk ( $\leq -5$ ) | 17/93                        | 18.2           | 13/92                       | 14.1           |

**eTable 6. Predicted mortality in relation to the sum score**

Predicted surgical 90-day mortality according to risk score in relation to the sum score obtained in table 2.

The predicted probability of surgical 90-day mortality (P (mortality), expressed in percentage (%), was calculated with the following formula:

$$p(\text{mortality}) = \left[ \frac{e^z}{1 + e^z} \right] * 100$$

$$p(\text{mortality}) = \left[ \frac{1}{1 + e^{-z}} \right] * 100 \text{ with } z = -3.382 - 0.311 * \text{score}$$

$$p(\text{mortality}) = \left[ \frac{1}{1 + e^{(3.382 + 0.311 * \text{score})}} \right] * 100$$

| IESG score | Estimated 90-day mortality (%) |
|------------|--------------------------------|
| -10        | 43.2                           |
| -9         | 35.8                           |
| -8         | 29                             |
| -7         | 23.1                           |
| -6         | 18                             |
| -5         | 13.9                           |
| -4         | 10.5                           |
| -3         | 8                              |
| -2         | 6                              |
| -1         | 4.4                            |
| 0          | 3.3                            |
| 1          | 2.4                            |
| 2          | 1.8                            |
| 3          | 1.3                            |
| 4          | 1                              |
| 5          | 0.7                            |

**eTable 7. Calculation of the score.** (Excel file also available to calculate score)

To fit the excel calculation, the formula was:

$p(\text{mortality}) = [1/(1 + e^{((3.382 + 0.311 * \text{score}))})] * 100$  . The result was expressed in %.

| Variable           | Weighted points | Enter score       | Variable                                  | Weighted points | Enter score |  |                                |
|--------------------|-----------------|-------------------|-------------------------------------------|-----------------|-------------|--|--------------------------------|
|                    |                 |                   |                                           |                 |             |  | <b>IESG score</b>              |
|                    |                 |                   |                                           |                 |             |  | <b>0</b>                       |
| <b>Age (years)</b> |                 | <b>0</b>          | <b>Myocardial Infarction</b>              | <b>-2</b>       | <b>0</b>    |  | <b>Predicted mortality (%)</b> |
| 40 or less         | <b>0</b>        |                   | <b>Connective tissue disease</b>          | <b>-3</b>       | <b>0</b>    |  | <b>3.3</b>                     |
| 41 – 50            | <b>1</b>        |                   | <b>Peripheral vascular disease</b>        | <b>-2</b>       | <b>0</b>    |  |                                |
| 51 – 60            | <b>1</b>        |                   | <b>Liver disease moderate to severe</b>   | <b>-5</b>       | <b>0</b>    |  |                                |
| 61 – 70            | <b>0</b>        |                   | <b>Neoadjuvant therapy</b>                |                 | <b>0</b>    |  |                                |
| 71-80              | <b>0</b>        |                   | None                                      | <b>0</b>        |             |  |                                |
| More than 80       | <b>-3</b>       |                   | Definitive Chemo/Radiotherapy             | <b>-2</b>       |             |  |                                |
|                    |                 | Chemotherapy only | <b>0</b>                                  |                 |             |  |                                |
| <b>BMI</b>         |                 | <b>0</b>          | Chemo-Radiotherapy                        | <b>-1</b>       |             |  |                                |
| <18.5              | <b>-3</b>       |                   | <b>Hospital volume (mean/year/center)</b> |                 | <b>0</b>    |  |                                |
| 18.5–24,9          | <b>0</b>        |                   | 0-45                                      | <b>0</b>        |             |  |                                |
| 25–29,9            | <b>1</b>        |                   | 46-71.6                                   | <b>0</b>        |             |  |                                |
| ≥30                | <b>1</b>        | 71.7-108.6        | <b>0</b>                                  |                 |             |  |                                |
| <b>Gender</b>      |                 | <b>0</b>          | >108.6                                    | <b>1</b>        |             |  |                                |
| Male               | <b>0</b>        |                   |                                           |                 |             |  |                                |
| Female             | <b>2</b>        |                   |                                           |                 |             |  |                                |
| <b>WHO/ECOG</b>    |                 | <b>0</b>          |                                           |                 |             |  |                                |
| 0                  | <b>0</b>        |                   |                                           |                 |             |  |                                |
| 1                  | <b>-1</b>       |                   |                                           |                 |             |  |                                |
| 2                  | <b>-2</b>       |                   |                                           |                 |             |  |                                |
| 3                  | <b>-4</b>       |                   |                                           |                 |             |  |                                |

**eTable 8. Repartition of death and complications among the whole cohort and among each risk group**

| Variables                                                | Total       | Very high risk | High risk  | Median risk | Low risk    | Very low risk |
|----------------------------------------------------------|-------------|----------------|------------|-------------|-------------|---------------|
|                                                          | N=8403      | N=185          | N=748      | N=2554      | N=2231      | N=2685        |
| <b>30-day death</b>                                      | 164 (2)     | 17 (9.2)       | 32 (4.3)   | 63 (2.5)    | 26 (1.2)    | 26 (1)        |
| <b>90-day death</b>                                      | 353 (4.2)   | 30 (16.2)      | 65 (8.7)   | 141 (5.5)   | 63 (2.8)    | 54 (2)        |
| <b>No complications</b>                                  | 3091 (37)   | 49 (27)        | 201 (28)   | 902 (35.3)  | 906 (40.6)  | 1033 (38.5)   |
| <b>Complication Clavien/Dindo</b>                        | 5312 (63)   | 136 (73)       | 547 (72)   | 1652 (64.7) | 1325 (59.4) | 1652 (61.5)   |
| Grade I                                                  | 624 (7.4)   | 13 (7)         | 52 (7)     | 192 (7.5)   | 172 (7.7)   | 195 (7.3)     |
| Grade II                                                 | 1903 (22.3) | 37 (20)        | 174 (23.3) | 605 (23.7)  | 528 (23.7)  | 559(20.8)     |
| Grade IIIa                                               | 1298 (15.4) | 30 (16.2)      | 136 (18.2) | 380 (14.9)  | 297 (13.3)  | 455 (16.9)    |
| Grade IIIb                                               | 658 (7.8)   | 21 (11.4)      | 67 (9)     | 194 (7.6)   | 156 (7)     | 220 (8.2)     |
| Grade IVa                                                | 535 (6.4)   | 9 (4.9)        | 69 (9.2)   | 174 (6.8)   | 118 (5.3)   | 165 (6.1)     |
| Grade IVb                                                | 98 (1.2)    | 2 (1.1)        | 8 (1.1)    | 33 (1.3)    | 25 (1.1)    | 30 (1.1)      |
| Grade V                                                  | 196 (2.3)   | 24 (13)        | 41 (5.5)   | 74 (2.9)    | 29 (1.3)    | 28 (1)        |
| <b>Pulmonary complications</b>                           | 2356 (28)   | 64 (34.6)      | 267 (35.7) | 747 (29.2)  | 582 (26.1)  | 696 (25.9)    |
| <b>Pneumonia</b>                                         | 1231 (14.6) | 39 (21.1)      | 138 (18.4) | 407 (15.9)  | 318 (14.3)  | 329 (12.3)    |
| <b>Respiratory failure requiring reintubation</b>        | 525 (6.2)   | 15 (8.1)       | 64 (8.6)   | 179 (7)     | 110 (4.9)   | 157 (5.8)     |
| <b>Acute respiratory distress syndrome</b>               | 163 (1.9)   | 8 (4.3)        | 22 (2.9)   | 49 (1.9)    | 41 (1.8)    | 43 (1.6)      |
| <b>Acute aspiration</b>                                  | 86 (1)      | 5 (2.7)        | 16 (2.1)   | 28 (1.1)    | 22 (1)      | 15 (0.6)      |
| Chyle leak                                               | 409 (4.9)   | 8 (4.3)        | 35 (4.7)   | 131 (5.1)   | 113 (5.1)   | 122 (4.5)     |
| <b>Esophagoenteric leak*</b>                             | 1108 (13.2) | 29 (15.7)      | 119 (15.9) | 367 (14.4)  | 262 (11.7)  | 331 (12.3)    |
| Type I                                                   | 253 (3)     | 3 (1.6)        | 23 (3.1)   | 95 (3.7)    | 70 (3.1)    | 62 (2.3)      |
| Type II                                                  | 549 (6.5)   | 13 (7)         | 61 (8.2)   | 175 (6.9)   | 123 (5.5)   | 177 (6.6)     |
| Type III                                                 | 300 (3.6)   | 13 (7)         | 34 (4.5)   | 95 (3.7)    | 68 (3)      | 90 (3.4)      |
| <b>Conduit necrosis/failure</b>                          | 93 (1.1)    | 3 (1.6)        | 19 (2.5)   | 29 (1.1)    | 28 (1.3)    | 14 (.5)       |
| <b>Ileus**</b>                                           | 101 (1.2)   | 4 (2.2)        | 13 (1.7)   | 28 (1.1)    | 28 (1.3)    | 28 (1)        |
| <b>Small bowel obstruction</b>                           | 34 (0.4)    | 2 (1.1)        | 2 (.3)     | 11 (.4)     | 9 (.4)      | 10 (.4)       |
| <b>Clostridium difficile infection</b>                   | 59 (.7)     | 4 (2.2)        | 6 (.8)     | 24 (.9)     | 12 (.5)     | 13 (.5)       |
| <b>GI bleeding requiring intervention or transfusion</b> | 50 (.6)     | 3 (1.6)        | 10 (1.3)   | 15 (.6)     | 6 (.3)      | 16 (.6)       |
| <b>Liver dysfunction</b>                                 | 67 (.8)     | 3 (1.6)        | 3 (.4)     | 9 (.4)      | 17 (.8)     | 35 (1.3)      |
| <b>Myocardial infarction</b>                             | 35 (0.4)    | 6 (3.2)        | 7 (.9)     | 11 (.4)     | 5 (.2)      | 6 (.2)        |
| <b>Pulmonary embolism</b>                                | 116 (1.4)   | 2 (1.1)        | 12 (1.6)   | 39 (1.5)    | 29 (1.3)    | 34 (1.3)      |
| <b>Dysrhytmia atrial requiring intervention</b>          | 1195 (14.2) | 33 (17.8)      | 129 (17.2) | 462 (18.1)  | 287 (12.9)  | 284 (10.6)    |
| <b>Acute renal insufficiency***</b>                      | 115 (1.4)   | 5 (2.7)        | 15 (2)     | 39 (1.5)    | 22 (1)      | 34 (1.3)      |
| <b>Acute renal failure requiring dialysis</b>            | 44 (.5)     | 2 (1.1)        | 6 (.5)     | 13 (.5)     | 9 (.4)      | 14 (.5)       |
| <b>Neurological / psychiatric</b>                        | 700 (8.3)   | 18 (9.7)       | 95 (12.7)  | 213 (8.3)   | 165 (7.4)   | 209 (7.8)     |
| <b>Multiple organ dysfunction syndrome</b>               | 51 (0.6)    | 7 (3.8)        | 12 (1.6)   | 12 (.5)     | 9 (.4)      | 11 (.4)       |

ECCG definitions of: \*Esophagoenteric leak: Type I: Local defect requiring no change in therapy or treated medically or with dietary modification; Type II: Localized defect requiring interventional but not surgical therapy, (e.g. Interventional radiology drain, stent); Type III: Localized defect requiring surgical therapy: \*\* Ileus defined as small bowel dysfunction preventing or delaying enteral feeding. \*\*\* Acute renal insufficiency defined as: doubling of baseline creatinine.

**eFigure 1. Flowchart of the study**

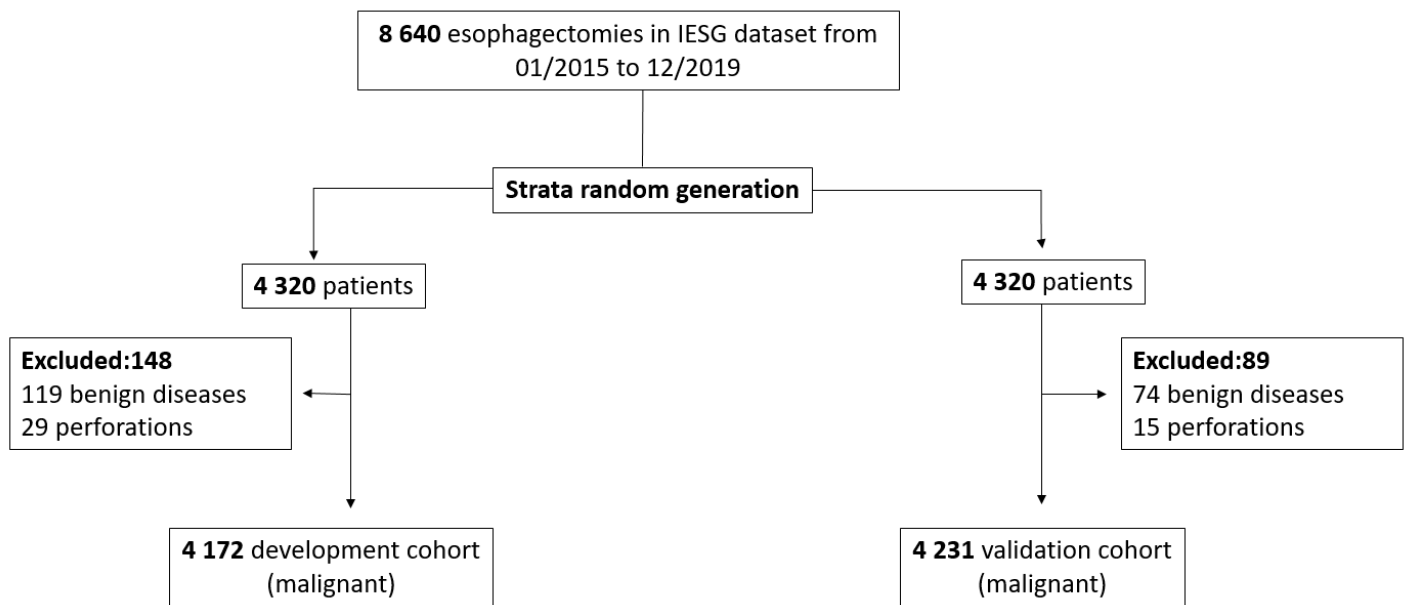

**eFigure 2. Funnel plot showing the 90-day deaths according to the hospital volume represented by the mean number of procedures of esophagectomy/year/center**

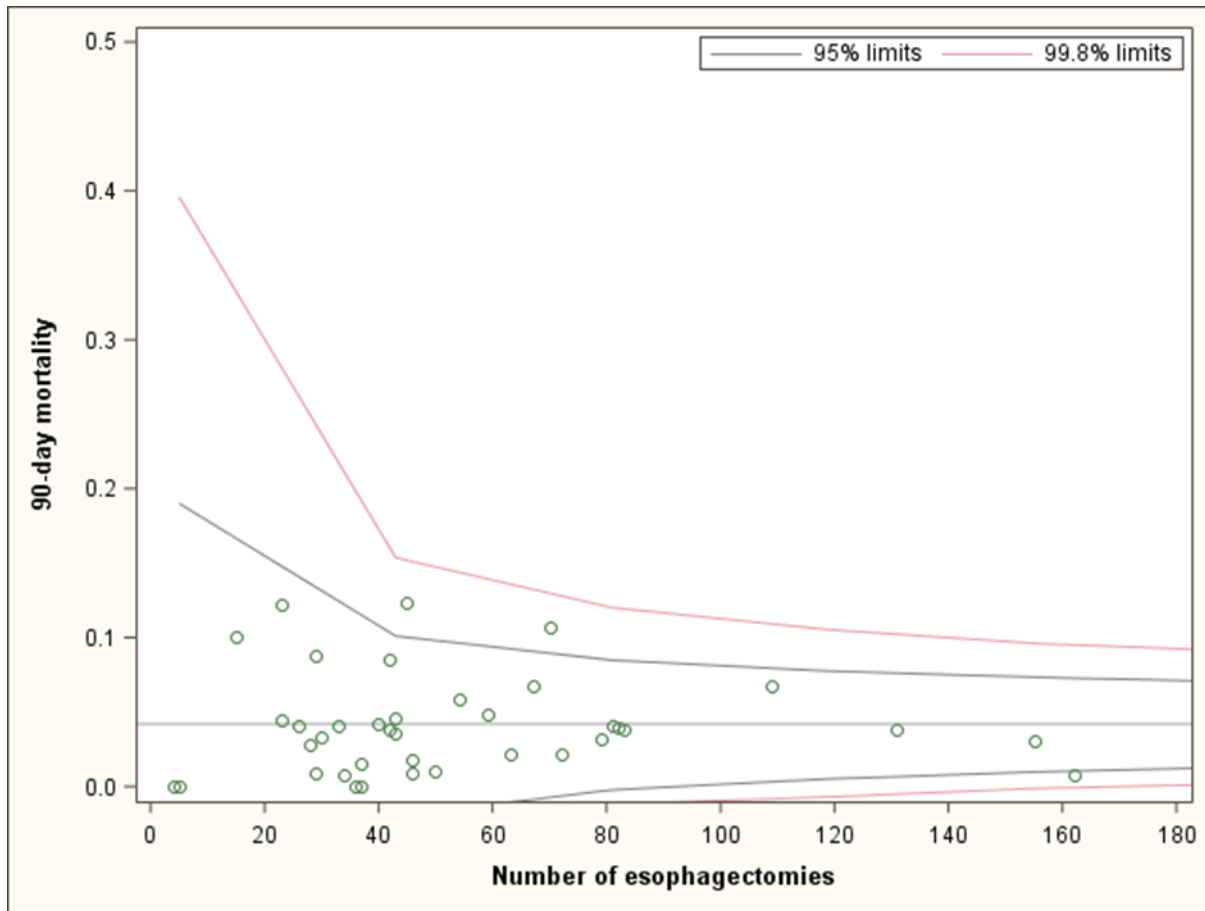

**eFigure 3. Distribution of patients in the validation and in the development cohort according to final score**

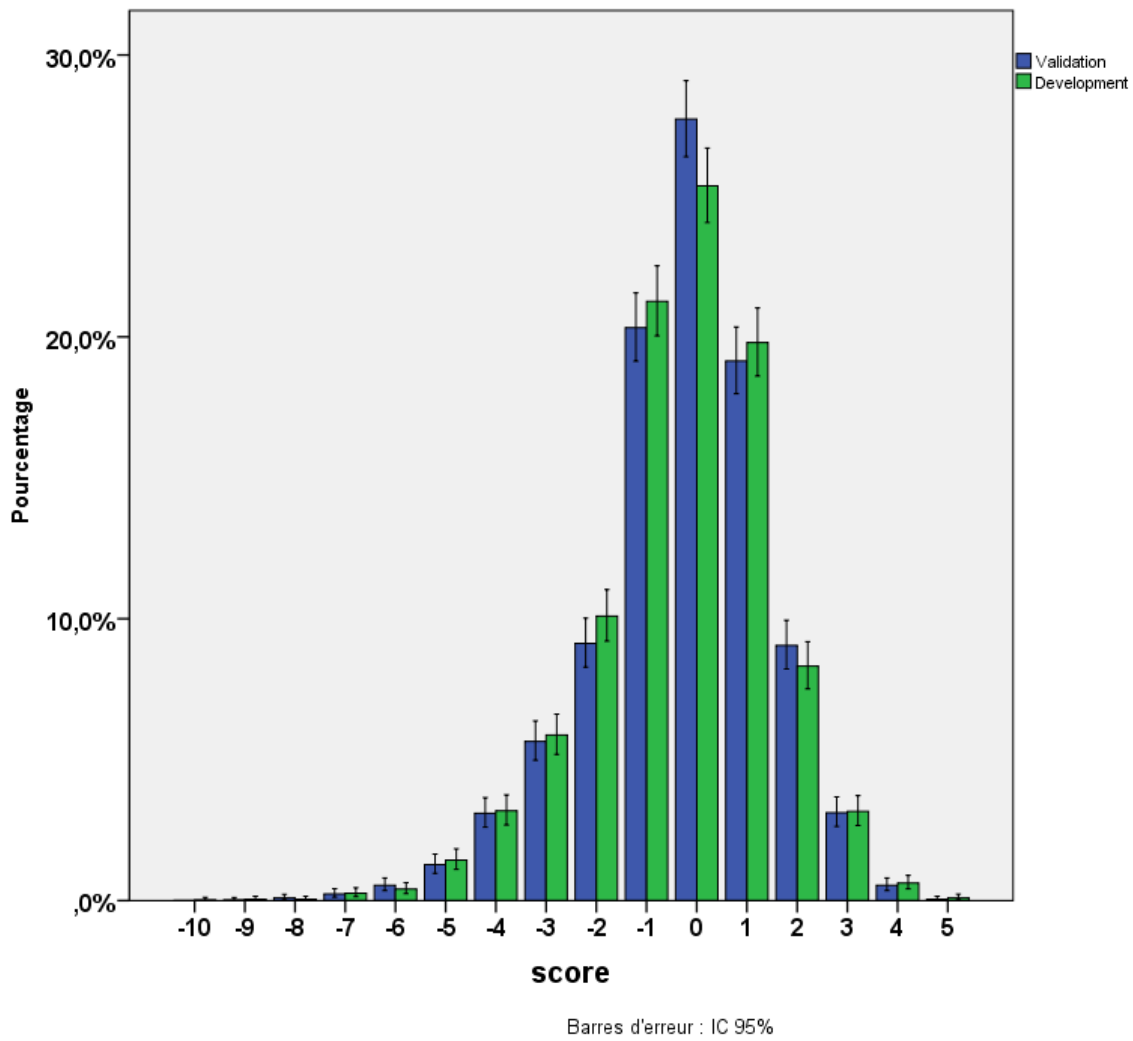



**eFigure 4. ROC curve of prediction 90-day mortality in validation, in development cohort, and in total cohort of the final score.**

**In term of discrimination, the model had a moderate score in both development and validation cohort with an AUC of .68 (95 %CI .64-.72) versus .64 (95%CI .6-0.69).**

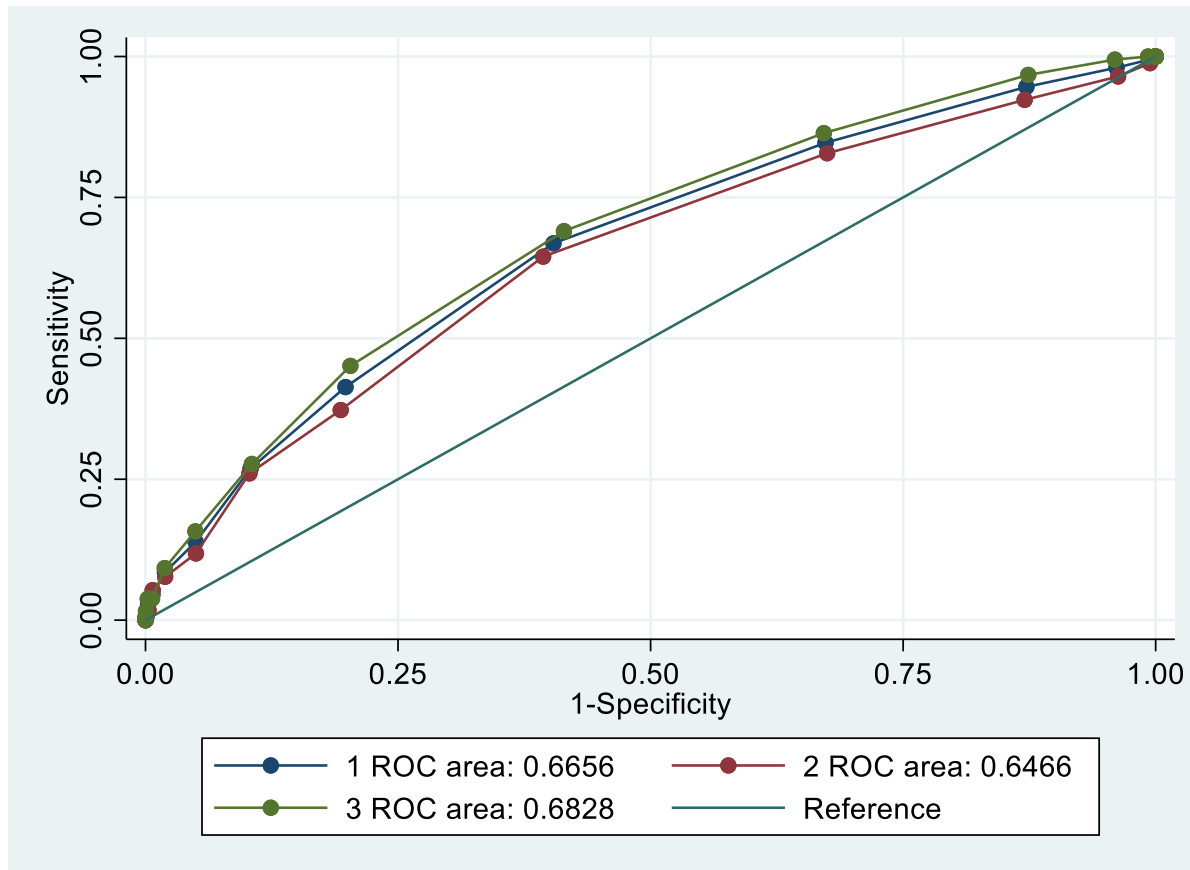

| Cohort                    | Obs  | ROC Area | Std.err. | 95% CI  |
|---------------------------|------|----------|----------|---------|
| Development (red)         | 4172 | .683     | .0197    | .64-.72 |
| Validation (green)        | 4231 | .646     | .0222    | .60-.69 |
| Total (blue)              | 8403 | .665     | .0148    | .63-.69 |
| Chi2: 1.49; df: 2; p=.474 |      |          |          |         |

**eFigure 5. Calibration of 90-day mortality after esophagectomy (n=8403)**

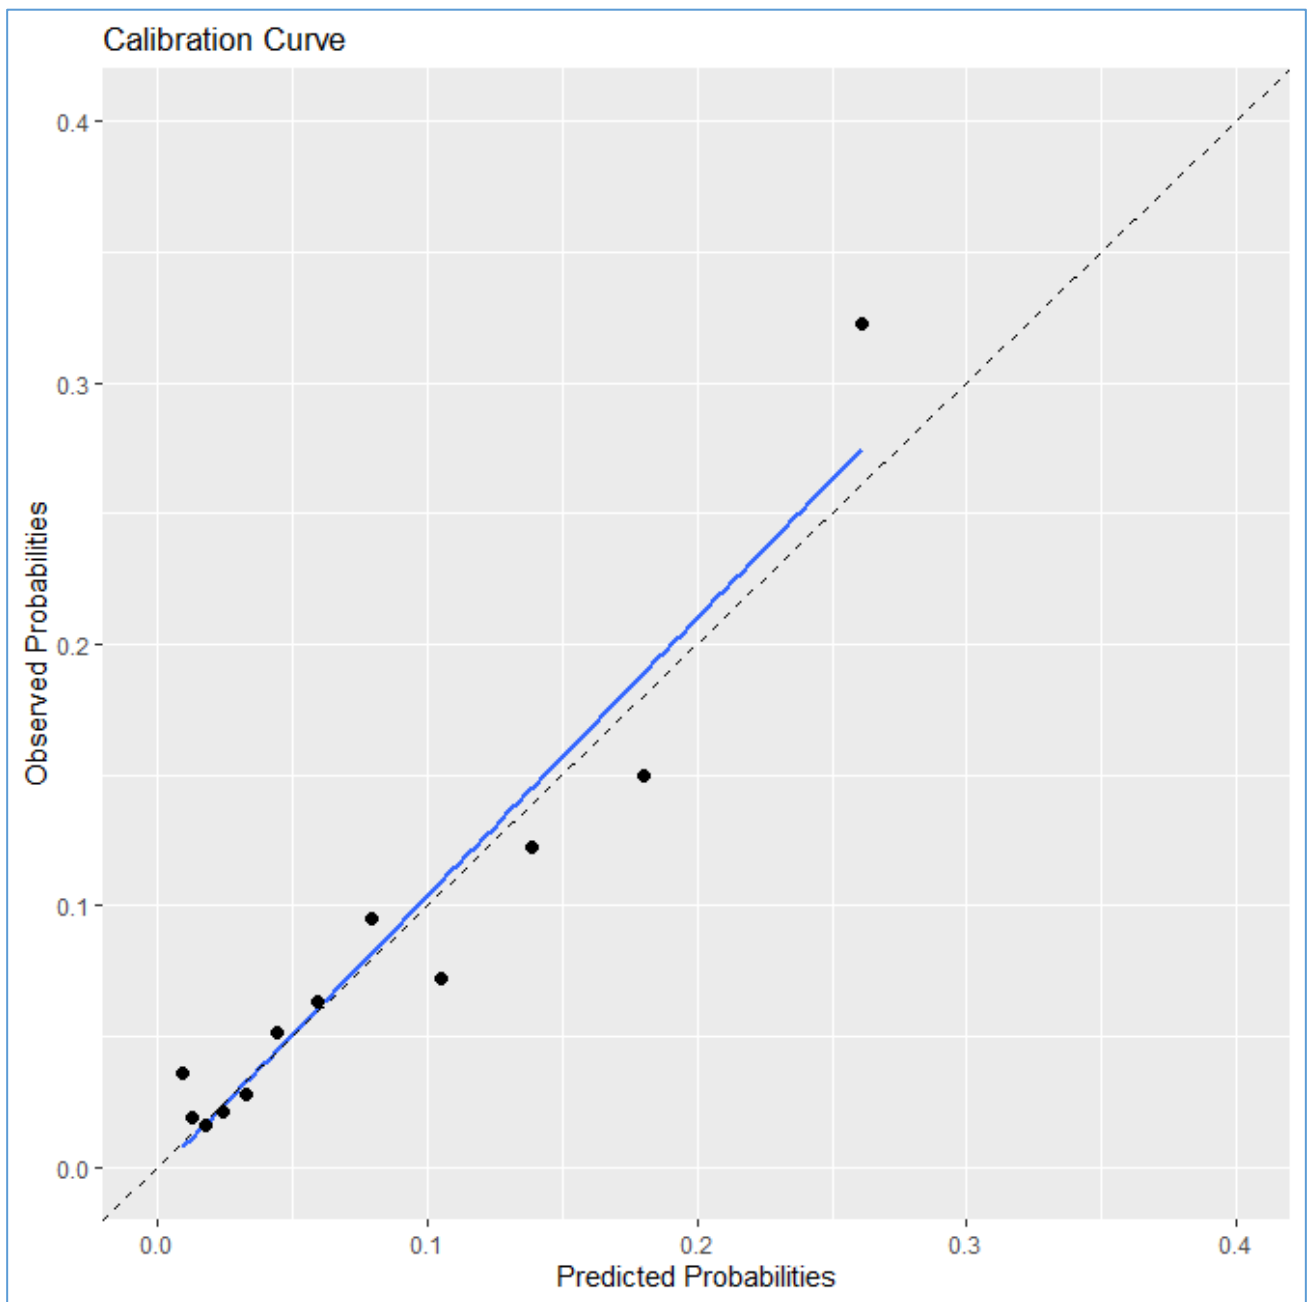

Supplement: jamasurg-e212376-s001.pdf [file jamasurg-e212376-s001.pdf]
