# Supplementary material
Source: PubMed Central journal article supplement (PMC8223144)
Supplement: jamasurg-e212376-s002.pdf [file jamasurg-e212376-s002.pdf]

## Supplemental Online Content: Nonauthor Collaborators

\*Indicates required information. Only first name, last name, and suffix will appear in PubMed.

| <b>Group Name: International Esodata Study Group</b> |             |                       |                  |                                           |                                          |                                                         |                                                                                            |
|------------------------------------------------------|-------------|-----------------------|------------------|-------------------------------------------|------------------------------------------|---------------------------------------------------------|--------------------------------------------------------------------------------------------|
| First Name and Middle Initial(s)*                    | Last Name*  | Suffix (eg, Jr, III)* | Academic Degrees | Institution                               | Location (city, state/province, country) | Role or Contribution, eg, chair, principal investigator | Group (if more than 1 Group listed in the byline and/or Subgroup (eg, Steering Committee)) |
| Geoffrey                                             | Brioude     |                       |                  | Aix-Marseille University, North Hospital  | Marseille, France                        | contributor                                             |                                                                                            |
| Delphine                                             | Trousse     |                       |                  | Aix-Marseille University, North Hospital, |                                          | contributor                                             |                                                                                            |
| Egle                                                 | Jezerskyte, |                       |                  | Amsterdam UMC, University of Amst         | Amsterdam, Netherlands                   | contributor                                             |                                                                                            |
| Wietse J                                             | Eshuis      |                       |                  | Amsterdam UMC, University of Amst         | Amsterdam, Netherlands                   | contributor                                             |                                                                                            |
| Richard                                              | Hardwick    |                       |                  | Cambridge Oesophago-Gastric Centre        | Cambridge, UK                            | contributor                                             |                                                                                            |
| Peter                                                | Safranek    |                       |                  | Cambridge Oesophago-Gastric Centre        | Cambridge, UK                            | contributor                                             |                                                                                            |
| John                                                 | Bennett     |                       |                  | Cambridge Oesophago-Gastric Centre        | Cambridge, UK                            | contributor                                             |                                                                                            |
| Andrew                                               | Hindmarsh   |                       |                  | Cambridge Oesophago-Gastric Centre        | Cambridge, UK                            | contributor                                             |                                                                                            |
| Vijay                                                | Sujedran    |                       |                  | Cambridge Oesophago-Gastric Centre        | Cambridge, UK                            | contributor                                             |                                                                                            |
| Martin                                               | Hemmerich   |                       |                  | Center for Esophageal Diseases, Elisa     | Essen, Germany                           | contributor                                             |                                                                                            |
| Margerite                                            | Messier     |                       |                  | Claude Huriez University Hospital         | Lille, France                            | contributor                                             |                                                                                            |
| Sebastien                                            | Degissors   |                       |                  | Claude Huriez University Hospital         | Lille, France                            | contributor                                             |                                                                                            |
| Frederiek                                            | Nuytens     |                       |                  | Claude Huriez University Hospital         | Lille, France                            | contributor                                             |                                                                                            |
| Christophe                                           | mariette    |                       |                  | Claude Huriez University Hospital         | Lille, France                            | contributor                                             |                                                                                            |
| Sjoerd M                                             | Lagarde     |                       |                  | Erasmus Medical Center                    | Rotterdam, Netherlands                   | contributor                                             |                                                                                            |
| Ali H                                                | Zaidi       |                       |                  | Esophageal and Lung Institute, Allegh     | Pittsburgh, PA, USA                      | contributor                                             |                                                                                            |
| Janine                                               | Zylstra     |                       |                  | Guy's & St Thomas' NHS Foundation         | London, UK                               | contributor                                             |                                                                                            |
| James                                                | Gossage     |                       |                  | Guy's & St Thomas' NHS Foundation         | London, UK                               | contributor                                             |                                                                                            |
| Cara                                                 | Baker       |                       |                  | Guy's & St Thomas' NHS Foundation         | London, UK                               | contributor                                             |                                                                                            |
| Mark                                                 | Kelly       |                       |                  | Guy's & St Thomas' NHS Foundation         | London, UK                               | contributor                                             |                                                                                            |
| Simone                                               | Schillinger |                       |                  | Hirslanden Medical Center                 | Zurich, Switzerland                      | contributor                                             |                                                                                            |
| Marta                                                | Gimeno      |                       |                  | Hospital Universitario del Mar            | Barcelona, Spain                         | contributor                                             |                                                                                            |
| Fredrik                                              | Klevebro    |                       |                  | Karolinska Institutet and Karolinska U    | Stockholm, Sweden                        | contributor                                             |                                                                                            |
| Masaru                                               | Hayami      |                       |                  | Karolinska Institutet and Karolinska U    | Stockholm, Sweden                        | contributor                                             |                                                                                            |
| Toni                                                 | Lerut       |                       |                  | Katholieke Universiteit Leuven            | Leuven, Belgium                          | contributor                                             |                                                                                            |
| Johnny                                               | Moons       |                       |                  | Katholieke Universiteit Leuven            | Leuven, Belgium                          | contributor                                             |                                                                                            |
| Hirofumi                                             | Kawakubo    |                       |                  | Keio University                           | Tokyo, Japan                             | contributor                                             |                                                                                            |
| Satoru                                               | Matsuda     |                       |                  | Keio University                           | Tokyo, Japan                             | contributor                                             |                                                                                            |

## Supplemental Online Content: Nonauthor Collaborators

\*Indicates required information. Only first name, last name, and suffix will appear in PubMed.

| First Name and Middle Initial(s)* | Last Name* | Suffix (eg, Jr, III)* | Academic Degrees | Institution                                           | Location (city, state/province, country) | Role or Contribution, eg, chair, principal investigator | Group (if more than 1 Group listed in the byline and/or Subgroup (eg, Steering Committee)) |
|-----------------------------------|------------|-----------------------|------------------|-------------------------------------------------------|------------------------------------------|---------------------------------------------------------|--------------------------------------------------------------------------------------------|
| Yuki                              | Hirata     |                       |                  | Keio University                                       | Tokyo, Japan                             | contributor                                             |                                                                                            |
| Julie                             | Garrity    |                       |                  | Massachusetts General Hospital                        | Boston, MA, USA                          | contributor                                             |                                                                                            |
| Huawei                            | Tang       |                       |                  | MD Anderson Cancer Center                             | Houston, TX, USA                         | contributor                                             |                                                                                            |
| Manjit                            | Bains      |                       |                  | Memorial Sloan Kettering Cancer Center                | New York City, NY, USA                   | contributor                                             |                                                                                            |
| Joe                               | Dycoco     |                       |                  | Memorial Sloan Kettering Cancer Center                | New York City, NY, USA                   | contributor                                             |                                                                                            |
| Kristen                           | Busalacchi |                       |                  | Memorial Sloan Kettering Cancer Center                | New York City, NY, USA                   | contributor                                             |                                                                                            |
| Rebecca                           | Carr       |                       |                  | Memorial Sloan Kettering Cancer Center                | New York City, NY, USA                   | contributor                                             |                                                                                            |
| David R                           | Jones      |                       |                  | Memorial Sloan Kettering Cancer Center                | New York City, NY, USA                   | contributor                                             |                                                                                            |
| Asim                              | Shabbir    |                       |                  | National University Hospital                          | Singapore, Singapore                     | contributor                                             |                                                                                            |
| Michael                           | Griffin    |                       |                  | Northern Oesophagogastric Cancer Unit                 | Newcastle upon Tyne, UK                  | contributor                                             |                                                                                            |
| Helen                             | Jaretzke   |                       |                  | Northern Oesophagogastric Cancer Unit                 | Newcastle upon Tyne, UK                  | contributor                                             |                                                                                            |
| Neil T                            | Welch      |                       |                  | Nottingham University Hospitals NHS                   | Nottingham, UK                           | contributor                                             |                                                                                            |
| Ravinder                          | Vohra      |                       |                  | Nottingham University Hospitals NHS                   | Nottingham, UK                           | contributor                                             |                                                                                            |
| James A                           | Catton     |                       |                  | Nottingham University Hospitals NHS                   | Nottingham, UK                           | contributor                                             |                                                                                            |
| John H                            | Saunders   |                       |                  | Nottingham University Hospitals NHS                   | Nottingham, UK                           | contributor                                             |                                                                                            |
| Fadi                              | Yanni      |                       |                  | Nottingham University Hospitals NHS                   | Nottingham, UK                           | contributor                                             |                                                                                            |
| Daniela                           | Zanotti    |                       |                  | Nottingham University Hospitals NHS                   | Nottingham, UK                           | contributor                                             |                                                                                            |
| Pritam                            | Singh      |                       |                  | Nottingham University Hospitals NHS                   | Nottingham, UK                           | contributor                                             |                                                                                            |
| Larsen                            | Nicolaj    |                       |                  | Odense University Hospital                            | Odense, Denmark                          | contributor                                             |                                                                                            |
| Marcus                            | Stilling   |                       |                  | Odense University Hospital                            | Odense, Denmark                          | contributor                                             |                                                                                            |
| Charlie C                         | Borzy      |                       |                  | Oregon Health and Science University                  | Portland, OR, USA                        | contributor                                             |                                                                                            |
| Kayla                             | Siemens    |                       |                  | Oregon Health and Science University                  | Portland, OR, USA                        | contributor                                             |                                                                                            |
| John                              | Findlay    |                       |                  | Oxford University Hospitals NHS Foundation Trust      | Oxford, UK                               | contributor                                             |                                                                                            |
| Stephen                           | Ash        |                       |                  | Oxford University Hospitals NHS Foundation Trust      | Oxford, UK                               | contributor                                             |                                                                                            |
| Iain                              | Thomson    |                       |                  | Princess Alexandra Hospital, University of Queensland | Brisbane, Australia                      | contributor                                             |                                                                                            |
| Andrew                            | Barbour    |                       |                  | Princess Alexandra Hospital, University of Queensland | Brisbane, Australia                      | contributor                                             |                                                                                            |
| Janine                            | Thomas     |                       |                  | Princess Alexandra Hospital, University of Queensland | Brisbane, Australia                      | contributor                                             |                                                                                            |
| John                              | Whiting    |                       |                  | Queen Elizabeth Hospital Birmingham                   | Birmingham, UK                           | contributor                                             |                                                                                            |
| Jeannette                         | Kwok       |                       |                  | Queen Mary Hospital, The University of Hong Kong      | Hong Kong SAR, China                     | contributor                                             |                                                                                            |
| Raymond                           | Kennedy    |                       |                  | Royal Victoria Hospital                               | Belfast, Northern Ireland                | contributor                                             |                                                                                            |
| Fang                              | Qiang      |                       |                  | Sichuan Cancer Hospital & Institute                   | Chengdu, China                           | contributor                                             |                                                                                            |

## Supplemental Online Content: Nonauthor Collaborators

\*Indicates required information. Only first name, last name, and suffix will appear in PubMed.

| First Name and Middle Initial(s)* | Last Name*     | Suffix (eg, Jr, III)* | Academic Degrees | Institution                           | Location (city, state/province, country) | Role or Contribution, eg, chair, principal investigator | Group (if more than 1 Group listed in the byline and/or Subgroup (eg, Steering Committee)) |
|-----------------------------------|----------------|-----------------------|------------------|---------------------------------------|------------------------------------------|---------------------------------------------------------|--------------------------------------------------------------------------------------------|
| Han                               | YongTao        |                       |                  | Sichuan Cancer Hospital & Institute   | Chengdu, China                           | contributor                                             |                                                                                            |
| Penh                              | Lin            |                       |                  | Sichuan Cancer Hospital & Institute   | Chengdu, China                           | contributor                                             |                                                                                            |
| Xiao                              | WenGuang       |                       |                  | Sichuan Cancer Hospital & Institute   | Chengdu, China                           | contributor                                             |                                                                                            |
| Sinead                            | King           |                       |                  | St. James's Hospital Trinity College  | Dublin, Ireland                          | contributor                                             |                                                                                            |
| Ravinder                          | Narayanasamy   |                       |                  | St. James's Hospital Trinity College  | Dublin, Ireland                          | contributor                                             |                                                                                            |
| Apurva                            | Ashok          |                       |                  | Tata Memorial Centre                  | Mumbai, India                            | contributor                                             |                                                                                            |
| Amy                               | Durkin-Celauro |                       |                  | The University of Chicago Medicine    | Chicago, IL, USA                         | contributor                                             |                                                                                            |
| Catherine                         | Staub          |                       |                  | The University of Chicago Medicine    | Chicago, IL, USA                         | contributor                                             |                                                                                            |
| Emma                              | Small          |                       |                  | Toronto General Hospital              | Toronto, Canada                          | contributor                                             |                                                                                            |
| Christiane J                      | Bruns          |                       |                  | University Hospital of Cologne        | Cologne, Germany                         | contributor                                             |                                                                                            |
| James                             | Byrne          |                       |                  | University Hospital Southampton NHS   | Southampton, UK                          | contributor                                             |                                                                                            |
| Jamie                             | Kelly          |                       |                  | University Hospital Southampton NHS   | Southampton, UK                          | contributor                                             |                                                                                            |
| Fergus                            | Noble          |                       |                  | University Hospital Southampton NHS   | Southampton, UK                          | contributor                                             |                                                                                            |
| Donna                             | Sharland       |                       |                  | University Hospital Southampton NHS   | Southampton, UK                          | contributor                                             |                                                                                            |
| Rachel                            | Fraser         |                       |                  | University Hospital Southampton NHS   | Southampton, UK                          | contributor                                             |                                                                                            |
| Rob                               | Walker         |                       |                  | University Hospital Southampton NHS   | Southampton, UK                          | contributor                                             |                                                                                            |
| Saqib                             | Rahman         |                       |                  | University Hospital Southampton NHS   | Southampton, UK                          | contributor                                             |                                                                                            |
| Ben                               | Grace          |                       |                  | University Hospital Southampton NHS   | Southampton, UK                          | contributor                                             |                                                                                            |
| Jelle                             | Ruurda         |                       |                  | University Medical Center             | Utrecht, Netherlands                     | contributor                                             |                                                                                            |
| Sylvia                            | Van der Host   |                       |                  | University Medical Center             | Utrecht, Netherlands                     | contributor                                             |                                                                                            |
| Arjen                             | Van der Veen   |                       |                  | University Medical Center             | Utrecht, Netherlands                     | contributor                                             |                                                                                            |
| Gino                              | Kuiper         |                       |                  | University Medical Center             | Utrecht, Netherlands                     | contributor                                             |                                                                                            |
| Judy                              | Miller         |                       |                  | University of Michigan Health System  | Ann Arbor, MI, USA                       | contributor                                             |                                                                                            |
| Shari                             | Barnett        |                       |                  | University of Michigan Health System  | Ann Arbor, MI, USA                       | contributor                                             |                                                                                            |
| Rubens AA                         | Sallum         |                       |                  | University of Sao Paulo School of Med | Sao Paulo, Brazil                        | contributor                                             |                                                                                            |
| Jacopo                            | Weindelmayer   |                       |                  | University of Verona                  | Verona, Italy                            | contributor                                             |                                                                                            |
| Carlo Alberto                     | De Pasqual     |                       |                  | University of Verona                  | Verona, Italy                            | contributor                                             |                                                                                            |
| Paolo                             | Parisse        |                       |                  | Vita-Salute San Raffaele University   | Milan, Italy                             | contributor                                             |                                                                                            |
| Andrea                            | Cossu          |                       |                  | Vita-Salute San Raffaele University   | Milan, Italy                             | contributor                                             |                                                                                            |
| Francesco                         | Puccetti       |                       |                  | Vita-Salute San Raffaele University   | Milan, Italy                             | contributor                                             |                                                                                            |

Supplemental Online Content: Nonauthor Collaborators

\*Indicates required information. Only first name, last name, and suffix will appear in PubMed.

| First Name and Middle Initial(s)* | Last Name* | Suffix (eg, Jr, III)* | Academic Degrees | Institution                         | Location (city, state/province, country) | Role or Contribution, eg, chair, principal investigator | Group (if more than 1 Group listed in the byline) and/or Subgroup (eg, Steering Committee) |
|-----------------------------------|------------|-----------------------|------------------|-------------------------------------|------------------------------------------|---------------------------------------------------------|--------------------------------------------------------------------------------------------|
| Simonetta                         | Massaron   |                       |                  | Vita-Salute San Raffaele University | Milan, Italy                             | contributor                                             |                                                                                            |
| Bonnie                            | Marston    |                       |                  | Virginia Mason Medical Center       | Seattle, WA, USA                         | contributor                                             |                                                                                            |
